# Supplementary material for: Nidogen-1 Could Play a Role in Diabetic Kidney Disease Development: A Genome Wide Association Meta-analysis
Source: Research Square preprint supplement (doi:10.21203/rs.3.rs-1848223/v1), 2022-07-19
Supplement: Supplementary file 1 [file 04410d807c754de3582168fe.docx]

**Supplementary Figure 1.** Q-Q plots:(**A**) Diabetic Kidney Disease (DKD). (**B**) eGFR measurement in T2D. (**C**) eGFR measurement in non-diabetic (T1D nor T2D). λ = genomic inflation factor.
